# Supplementary material for: Genetic elements promote retention of extrachromosomal DNA in cancer cells
Source: Springer Nature journal article supplement (doi:10.1038/s41586-025-09764-8), 2025-11-19
Supplement: MOESM1 [file 41586_2025_9764_MOESM1_ESM.pdf › 41586_2025_9764_MOESM1_ESM.pdf]

---

**Supplementary information**

---

**Genetic elements promote retention of  
extrachromosomal DNA in cancer cells**

---

In the format provided by the  
authors and unedited

**Genetic elements retain extrachromosomal DNA in dividing cancer cells**

Venkat Sankar<sup>1,#</sup>, King L. Hung<sup>1,4,#</sup>, Aditi Gnanasekar<sup>2,3</sup>, Ivy Tsz-Lo Wong<sup>2,3</sup>, Quanming Shi<sup>1,5</sup>, Katerina Kraft<sup>1</sup>, Matthew G. Jones<sup>1</sup>, Britney Jiayu He<sup>1</sup>, Xiaowei Yan<sup>1</sup>, Julia A. Belk<sup>1</sup>, Kevin J. Liu<sup>6</sup>, Sangya Agarwal<sup>1,5</sup>, Sean K. Wang<sup>1</sup>, Anton G. Henssen<sup>7,8,9</sup>, Paul S. Mischel<sup>2,3\*</sup>, Howard Y. Chang<sup>1,3,5,10\*</sup>

<sup>1</sup> Departments of Dermatology and Genetics, Stanford University, Stanford, CA, USA.

<sup>2</sup> Sarafan ChEM-H, Stanford University, Stanford, CA, USA.

<sup>3</sup> Department of Pathology, Stanford University, Stanford, CA, USA.

<sup>4</sup> Current address: Department of Neuroscience, Scripps Research, La Jolla, CA, USA.

<sup>5</sup> Current address: Amgen Research, South San Francisco, CA, USA.

<sup>6</sup> Program in Cancer Biology, Stanford University, Stanford, CA, USA.

<sup>7</sup> Department of Pediatric Hematology and Oncology, Charité-Universitätsmedizin Berlin, Berlin, Germany.

<sup>8</sup> Berlin Institute of Health, Berlin, Germany.

<sup>9</sup> Experimental and Clinical Research Center, Max Delbrück Center for Molecular Medicine and Charité-Universitätsmedizin Berlin, Berlin, Germany.

<sup>10</sup> Howard Hughes Medical Institute, Stanford University School of Medicine, Stanford, CA 94305, USA.

# These authors contributed equally

\* Correspondence should be addressed to H.Y.C ([howchang@stanford.edu](mailto:howchang@stanford.edu)) and P.S.M. ([pmischel@stanford.edu](mailto:pmischel@stanford.edu))

## **Table of Contents**

**Supplementary Table 1:** CRISPR guide RNA sequences.

**Supplementary Table 2:** PCR primer sequences.

## Supplementary Tables

**Supplementary Table 1.**

| Guide RNA target sequence | Guide RNA information                                   |
|---------------------------|---------------------------------------------------------|
| AGCGATGCGACCCTCCGGGA      | CRISPRoff cargo guide                                   |
| TCCATCCGCCCCGGTCACCGC     | CRISPRoff cargo guide                                   |
| GGCTCATCCGTGGTCGCCGG      | CRISPRoff cargo guide                                   |
| CCGCTCAACAAGTTCCCCGC      | CRISPRoff cargo guide                                   |
| CGCCATCTTGCTCGGCGCCT      | CRISPRoff cargo guide                                   |
| CCACUUGCCGUGAUUAUGAAC     | CHD1 KO1                                                |
| UUAUUUCGCCUAAGAGAACG      | CHD1 KO2                                                |
| UCGACAGAGACAAUCUCGCA      | SMARCE1 KO1                                             |
| UUGAUUCUCCUACCGUGACC      | SMARCE1 KO2                                             |
| AAACCAGUCGAACUCGAAGC      | HEY1 KO1                                                |
| AAUGUGUCCGAGGCCCGCGU      | HEY1 KO2                                                |
| GAACGACUAGUUAGGCGUGUA     | Non-targeting control 1 (NTC1) ( <i>Gal4</i> targeting) |
| GTGCTGCAAGGCGATTAAGT      | Non-targeting control 2 (NTC2) ( <i>LacZ</i> targeting) |

**Supplementary Table 2.**

| Primer sequence                                            | Primer information        |
|------------------------------------------------------------|---------------------------|
| GTCGACTCTAGAGGATCCCCTCGTCG<br>GCAGCGTCAGATGTGTATAAGAGACAG  | p5_pUC19_Smal_20b<br>p    |
| TGAATTCGAGCTCGGTACCCGTCTCGT<br>GGGCTCGGAGATGTGTATAAGAGACAG | p7_pUC19_Smal_20b<br>p    |
| GTCGACTCTAGAGGATCCCC                                       | pUC19_Smal_5prime<br>_fwr |
| TGAATTCGAGCTCGGTACCC                                       | pUC19_Smal_3prime<br>_rev |
| TCGTCGGCAGCGTCAGATGTGTATAAGAGACAG                          | p5_adapter_only           |
| GTCTCGTGGGCTCGGAGATGTGTATAAGAGACAG                         | p7_adapter_only           |
|                                                            |                           |
| ACCATGATTACGCCAATCCAGATGCCTCTCTGGCC                        | pUC19_2RE forward         |
| ACCTGCAGGCATGCACCTAGGCTTGAACCCCTCCA                        | pUC19_2RE reverse         |
| GGGGTACCGAGCTCGATCCAGATGCCTCTCTGGCC                        | pUC19_3RE forward         |
| AAACGACGGCCAGTGCCTAGGCTTGAACCCCTCCA                        | pUC19_3RE reverse         |
| ACCATGATTACGCCAATCCAGATGCCTCTCTGGCC                        | pUC19_tile1 forward       |
| ACCTGCAGGCATGCAGATGTGGGTGGGGCCAGATA                        | pUC19_tile1 reverse       |
| ACCATGATTACGCCATTACAGCTCTTAAGGCGGCG                        | pUC19_tile2 forward       |

|                                                   |                     |
|---------------------------------------------------|---------------------|
| ACCTGCAGGCATGCAACACCAATCGGCACTCTGTATC             | pUC19_tile2 reverse |
| ACCATGATTACGCCACCACATCCTGCTGATTGGTCC              | pUC19_tile3 forward |
| ACCTGCAGGCATGCATCCACTGGGTGAAGCCAGCT               | pUC19_tile3 reverse |
| ACCATGATTACGCCAGATACAGAGTGCCGATTGGTGT             | pUC19_tile4 forward |
| ACCTGCAGGCATGCAGCGCTGTACTCGATTTCTCG               | pUC19_tile4 reverse |
| ACCATGATTACGCCAAGCTGGCTTCACCCAGTGGA               | pUC19_tile5 forward |
| ACCTGCAGGCATGCACCCTCTCTGGGCTGGCCAAG               | pUC19_tile5 reverse |
| ACCATGATTACGCCAGAAATCGAGTACAGCGCCGG               | pUC19_tile6 forward |
| ACCTGCAGGCATGCATGGTGAGAGGCAGAACTGGC               | pUC19_tile6 reverse |
| ACCATGATTACGCCACCTTGGCCAGCCCAGAGAGG               | pUC19_tile7 forward |
| ACCTGCAGGCATGCAGGCTCTGGGACTCAGCATGAGA             | pUC19_tile7 reverse |
| ACCATGATTACGCCAGCCTCTTGTGCCAGTTCTGC               | pUC19_tile8 forward |
| ACCTGCAGGCATGCACCTAGGCTTGAACCCCTCCA               | pUC19_tile8 reverse |
| ACCATGATTACGCCAGGCATTGATTATTGACTAGT               | pUC19_CMV forward   |
| ACCTGCAGGCATGCAAGCTCTGCTTATATAGACCT               | pUC19_CMV reverse   |
| CAACAAGGTCTCCAATTGACTAGATTAGCTAGATACAGA<br>GTGTCC | pGL4_RE1 forward    |
| GCAAACGGATCCGTTTCTGGAGAAAGGGAGTAAGTAAG            | pGL4_RE1 reverse    |
| ATTTCCGTGTCGCCCTTATT                              | qPCR pUC19_F        |
| ACCGCTGTTGAGATCCAGTT                              | qPCR pUC19_R        |
| CACCGTCAAGGCTGAGAAC                               | qPCR GAPDH_F        |
| TATACCCAAGGGAGCCACAC                              | qPCR GAPDH_R        |
| CCGCCTCCATCCAGTCTAT                               | qPCR pGL4_F         |
| CGAACGACGAGCGTGATAC                               | qPCR pGL4_R         |
